# Supplementary material for: Spin and valence isomerism in cyanide-bridged {FeIII2MII} (M = Fe and Co) clusters
Source: Royal Society of Chemistry journal article supplement (doi:10.1039/d1dt01298c), 2021-01-01
Supplement: d1dt01298c1.pdf [file d1dt01298c1.pdf]

## Supporting Information

### Spin and Valence Isomerism in Cyanide-Bridged $\{\text{Fe}^{\text{III}}_2\text{M}^{\text{II}}\}$ (M = Fe, Co) Clusters

Xin-Hua Zhao,<sup>a</sup> Dong Shao,<sup>a</sup> Jia-Tao Chen,<sup>a</sup> Min Liu,<sup>b</sup> Tao Li,<sup>a</sup> Jiong Yang,<sup>a</sup> and Yuan-Zhu Zhang\*<sup>a</sup>

<sup>a</sup> *Department of Chemistry, Southern University of Science and Technology, Shenzhen, 518055, P. R. China.*

<sup>b</sup> *College of Nuclear Science and Technology, University of South China, Hengyang, 421001, P. R. China.*

---

**Table S1** Selected bond lengths [Å] and bond angles [°] for **1**.

|              | 100 K    | 290 K    |
|--------------|----------|----------|
| Fe1-N1       | 1.994(4) | 2.153(4) |
| Fe1-N2       | 2.059(4) | 2.219(4) |
| Fe1-N3       | 1.934(4) | 2.059(4) |
| Fe2-N6       | 2.009(4) | 2.000(4) |
| Fe2-N8       | 1.972(4) | 1.978(4) |
| Fe2-N10      | 2.014(4) | 2.006(4) |
| Fe2-C14      | 1.918(5) | 1.897(5) |
| Fe2-C15      | 1.936(5) | 1.927(5) |
| Fe2-C16      | 1.923(5) | 1.924(6) |
| Fe1-Fe1      | 4.994(1) | 5.093(1) |
| N1-Fe1-N1A   | 178.0(2) | 172.1(2) |
| N1-Fe1-N2A   | 97.9(2)  | 97.7(2)  |
| N1-Fe1-N2    | 80.6(2)  | 76.3(2)  |
| N2-Fe1-N2A   | 85.9(2)  | 81.8(2)  |
| N3A-Fe1-N1   | 92.7(2)  | 94.1(2)  |
| N3-Fe1-N1    | 88.7(2)  | 91.4(2)  |
| N3A-Fe1-N2   | 172.8(2) | 168.4(2) |
| N3-Fe1-N2    | 92.5(2)  | 93.4(2)  |
| N3-Fe1-N3A   | 90.0(2)  | 93.3(2)  |
| C14-N3-Fe1   | 177.5(4) | 176.9(4) |
| N3-C14-Fe2   | 171.4(4) | 173.1(5) |
| Fe2-Fe1-Fe2A | 92.7(1)  | 94.1(1)  |

A -x+1,y,-z+1/2

**Table S2** The hydrogen bonds in **1** at 100 K.

| D-H...A      | D-H [Å] | H...A [Å] | D...A [Å] | ∠D-H...A [°] |
|--------------|---------|-----------|-----------|--------------|
| O1-H1B ...N4 | 0.84    | 2.56      | 3.07(2)   | 120          |
| O2-H2A ...N5 | 0.87    | 2.21      | 2.99(3)   | 149          |
| O2-H2B ...O3 | 0.87    | 1.89      | 2.36(4)   | 112          |
| O3-H3A ...O2 | 0.87    | 1.60      | 2.36(4)   | 144          |
| O4-H4A ...N5 | 0.87    | 2.51      | 3.16(3)   | 132          |

**Table S3** Selected bond lengths [Å] and bond angles [°] for **2**.

|              | 100 K    | 300 K    |
|--------------|----------|----------|
| Co1-N1       | 2.024(6) | 2.115(4) |
| Co1-N2       | 2.028(6) | 2.141(4) |
| Co1-N3       | 1.966(5) | 2.036(4) |
| Fe1-N6       | 1.982(5) | 1.973(3) |
| Fe1-N8       | 2.020(5) | 2.015(3) |
| Fe1-N10      | 2.029(5) | 2.027(4) |
| Fe1-C14      | 1.913(7) | 1.904(5) |
| Fe1-C15      | 1.923(7) | 1.929(5) |
| Fe1-C16      | 1.935(6) | 1.935(5) |
| Fe1-Co1      | 5.015(1) | 5.076(1) |
| N1-Co1-N1A   | 176.2(3) | 174.1(2) |
| N1-Co1-N2A   | 98.5(3)  | 99.3(2)  |
| N1-Co1-N2    | 78.6(3)  | 76.2(2)  |
| N1-Co1-N3    | 93.4(2)  | 94.3(2)  |
| N1A-Co1-N3   | 89.2(2)  | 89.8(2)  |
| N2-Co1-N3    | 171.0(3) | 168.6(2) |
| N2A-Co1-N3   | 93.3(2)  | 93.6(2)  |
| N2-Co1-N2A   | 83.9(4)  | 82.0(2)  |
| N3-Co1-N3A   | 90.7(3)  | 92.7(2)  |
| C14-N3-Co1   | 177.2(5) | 176.7(3) |
| N3-C14-Fe1   | 172.1(6) | 172.8(4) |
| Fe1-Co1-Fe1A | 92.8(2)  | 94.0(1)  |

A -x+1,y,-z+3/2

**Table S4** The hydrogen bonds in **2** at 100 K.

| D-H...A      | D-H [Å] | H...A [Å] | D...A [Å] | ∠D-H...A [°] |
|--------------|---------|-----------|-----------|--------------|
| O1-H1B ...N4 | 0.84    | 2.14      | 2.82(2)   | 138          |
| O4-H4A ...O5 | 0.87    | 1.96      | 2.77(4)   | 152          |
| O5-H5B ...N4 | 0.87    | 2.45      | 3.05(2)   | 127          |

**Table S5** CV data of complex **2**.

|                                                                                                                              | $E_{pa}$ [V] | $E_{pc}$ [V] | $E_{1/2}$ [V] | $\Delta E$ [V] |
|------------------------------------------------------------------------------------------------------------------------------|--------------|--------------|---------------|----------------|
| $[\text{Fe}^{\text{II}}_2\text{Co}^{\text{II}}]^{2-}/[\text{Fe}^{\text{III}}\text{Fe}^{\text{II}}\text{Co}^{\text{II}}]^{-}$ | -0.551       | -0.795       | -0.673        |                |
| $[\text{Fe}^{\text{III}}\text{Fe}^{\text{II}}\text{Co}^{\text{II}}]^{-}/[\text{Fe}^{\text{III}}_2\text{Co}^{\text{II}}]$     | -0.063       | -0.317       | -0.190        | 0.538          |
| $[\text{Fe}^{\text{III}}_2\text{Co}^{\text{II}}]/[\text{Fe}^{\text{III}}_2\text{Co}^{\text{II}}]^{+}$                        | 0.531        | 0.165        | 0.348         |                |

**Table S6** Thermal dynamic parameters derived from the fitting of  $\chi_{\text{M}}T$  vs.  $T$  plots for **1** and **2**.

| Compound | $\Delta H$ (kJ mol <sup>-1</sup> ) | $\Delta S$ (J mol <sup>-1</sup> K <sup>-1</sup> ) | $T_{1/2}$ (K) | $\Gamma$ (kJ mol <sup>-1</sup> ) |
|----------|------------------------------------|---------------------------------------------------|---------------|----------------------------------|
| <b>1</b> | 21.87                              | 87.46                                             | 250           | 0.42                             |
| <b>2</b> | 15.42                              | 84.49                                             | 182           | -0.84                            |

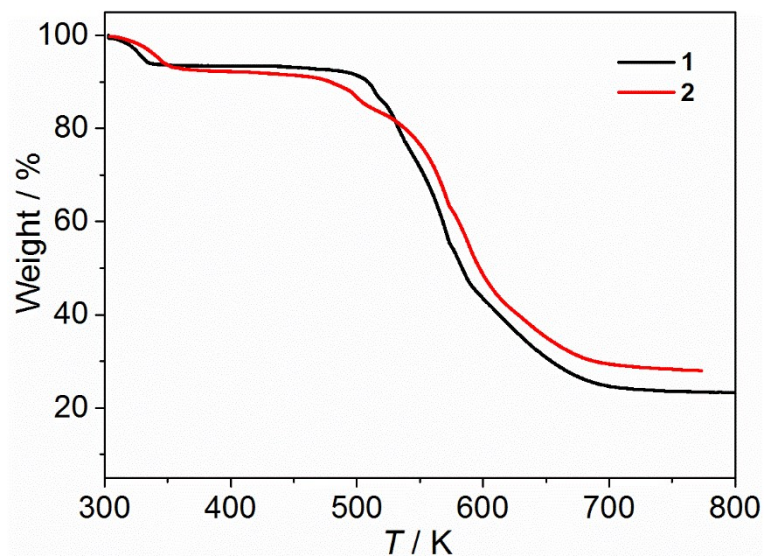

**Fig. S1** TGA curves of **1** and **2** at a rate of 10 K/min under an argon atmosphere.

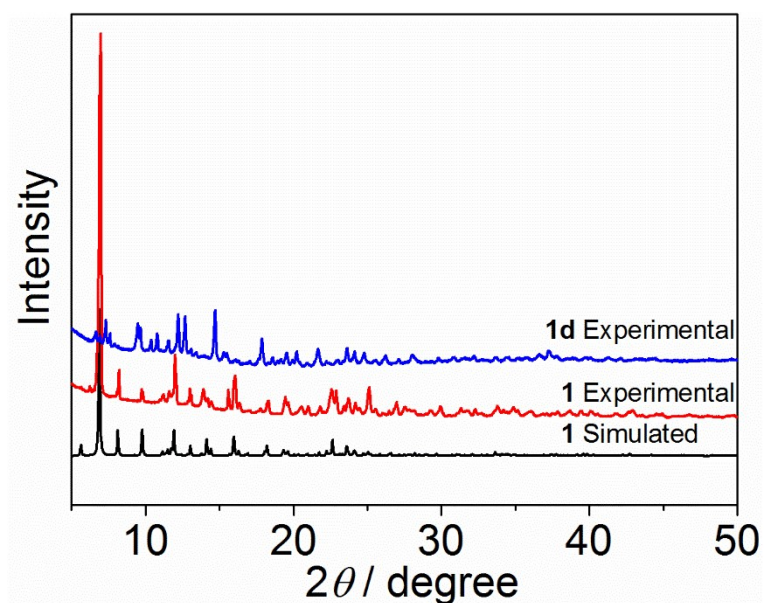

**Fig. S2** The experimental and simulated PXRD patterns of **1** and **1d**.

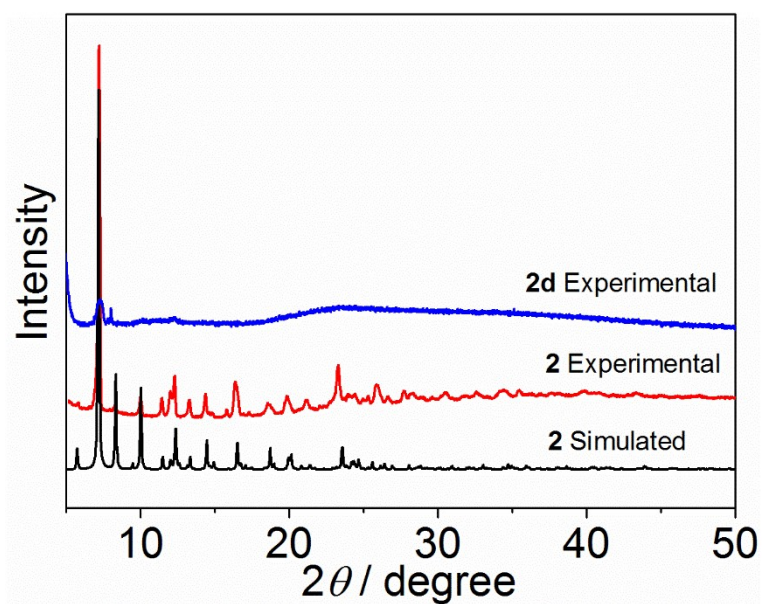

**Fig. S3** The experimental and simulated PXRD patterns of **2** and **2d**.

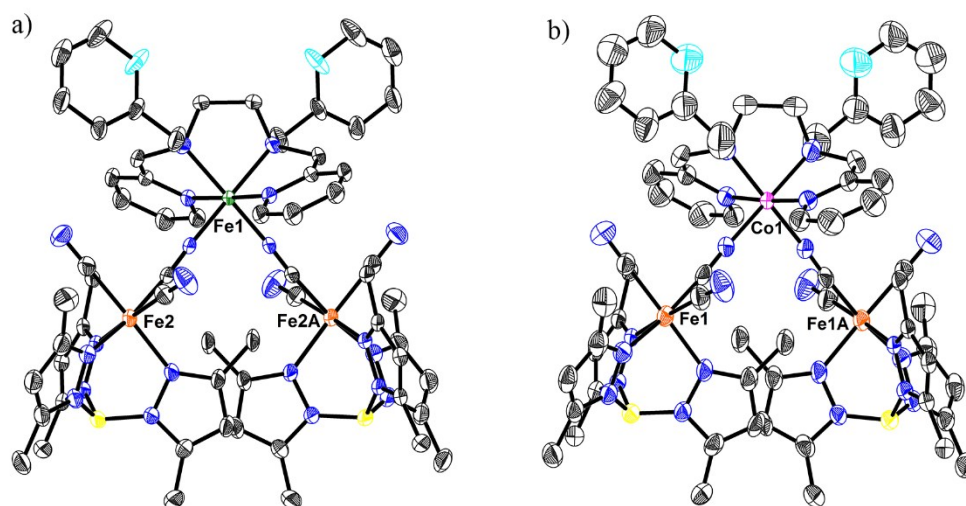

**Fig. S4** ORTEP drawing of a)  $[\{\text{Tp}^*\text{Fe}(\text{CN})_3\}_2\{\text{Fe}(\text{bztpen})\}]$  for **1** and b)  $[\{\text{Tp}^*\text{Fe}(\text{CN})_3\}_2\{\text{Co}(\text{bztpen})\}]$  for **2**. Ellipsoids enclose 50% probability. The hydrogen atoms and solvent molecules have been omitted for clarity.

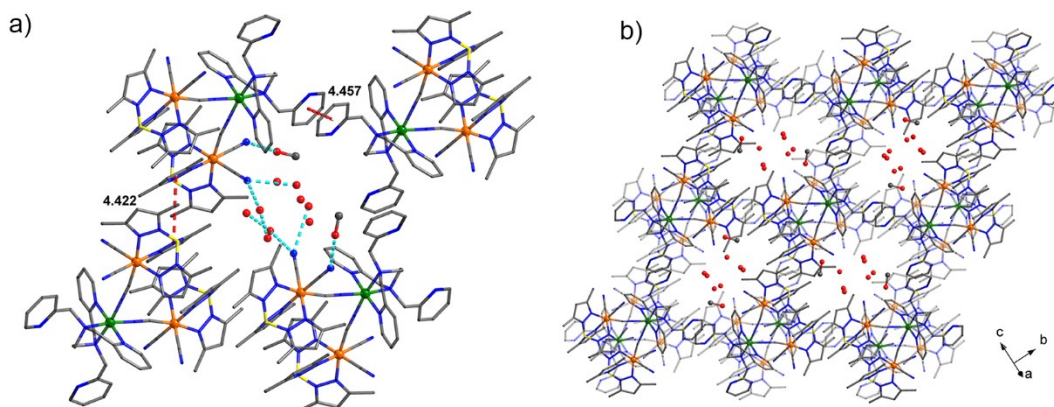

**Fig. S5** a) The intermolecular interactions between neighbouring  $\{\text{Fe}_2\text{Fe}\}$  and the lattice solvents for **1**, the turquoise and red dashed lines represent the hydrogen bonds and the center-center distances of neighboring pyridyl or pyrazolyl rings, respectively. b) The crystal packing of **1**.

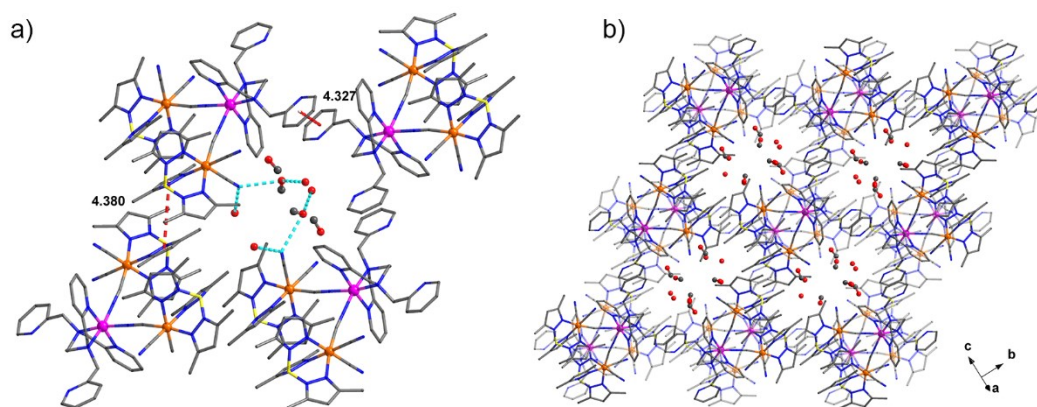

**Fig. S6** a) The intermolecular interactions between neighbouring  $\{\text{Fe}_2\text{Co}\}$  and the lattice solvents for **2**, the turquoise and red dashed lines represent the hydrogen bonds and the centroid-centroid distances of neighboring pyridyl or pyrazolyl rings, respectively. b) The crystal packing of **2**.

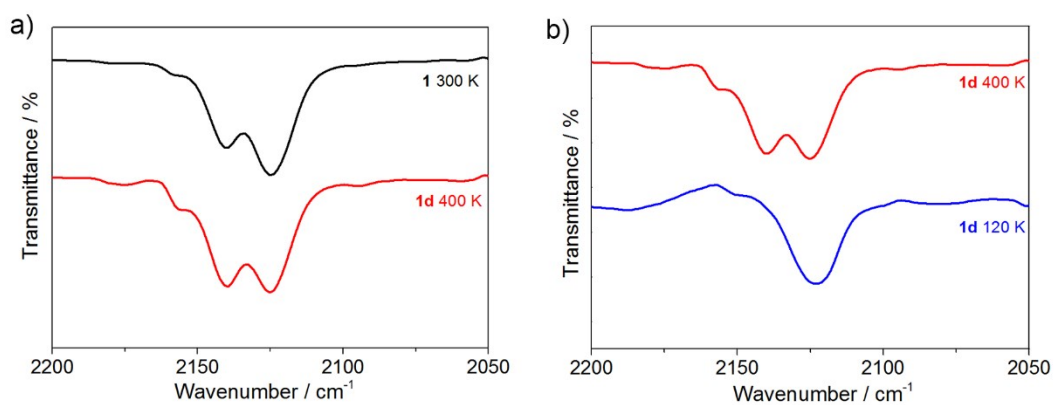

**Fig. S7** Temperature-dependent IR spectra of **1** and **1d**.

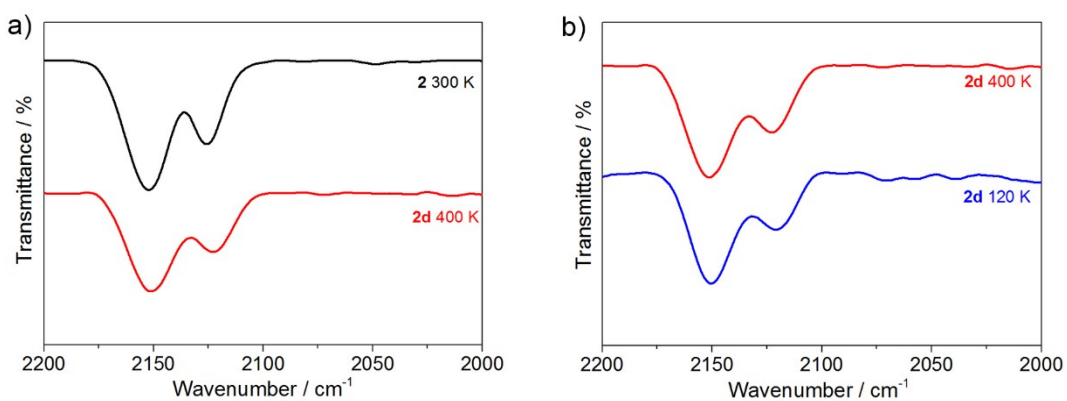

**Fig. S8** Temperature-dependent IR spectra of **2** and **2d**.

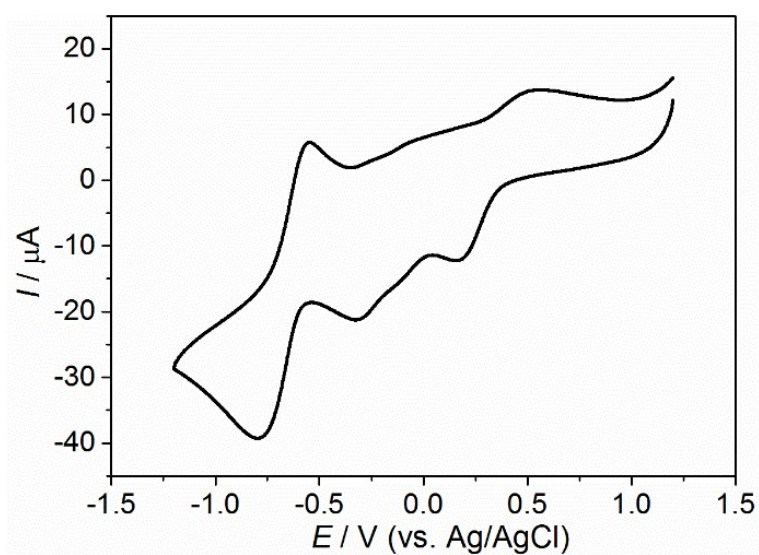

**Fig. S9** Cyclic voltammogram of **2** in 0.1M (nBu<sub>4</sub>)PF<sub>6</sub> in CH<sub>2</sub>Cl<sub>2</sub>.



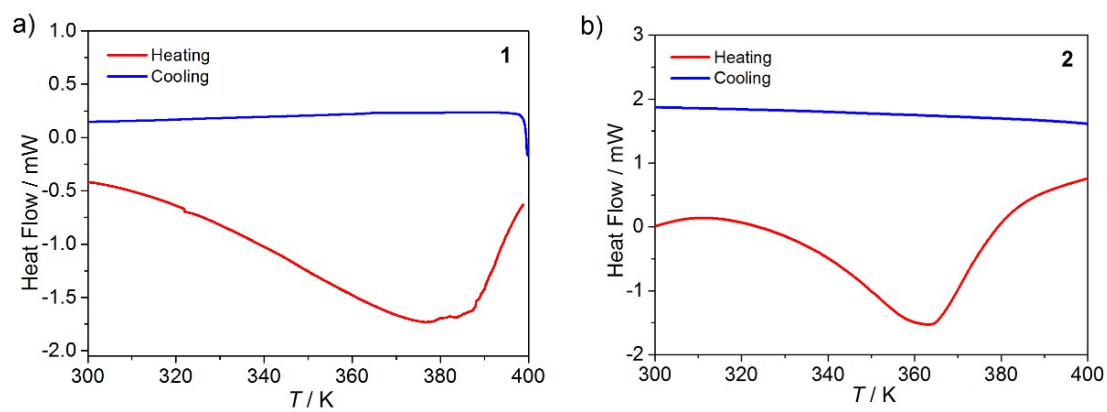

**Fig. S10** DSC curves of a) **1** and b) **2**.

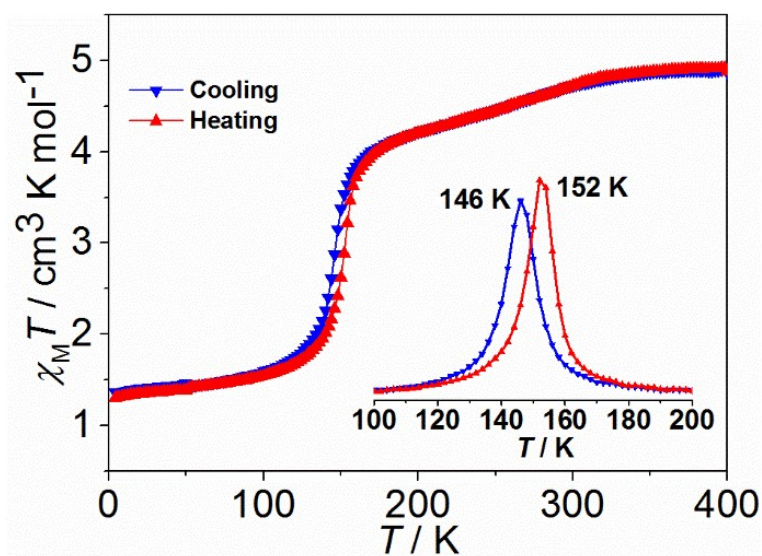

**Fig. S11** Temperature dependent  $\chi_M T$  plots of **1d** under a sweeping rate of 2 K/min, insert: The  $d(\chi_M T)/dT$  vs  $T$  plots used to determine the  $T_{1/2}$  values.

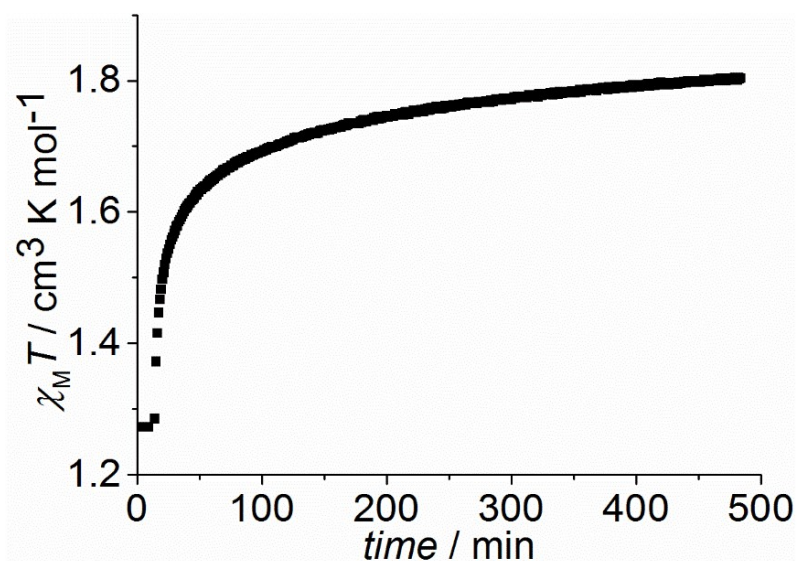

**Fig. S12**  $\chi_M T$  vs time plot of **2** irradiated at 808 nm at 20 K.

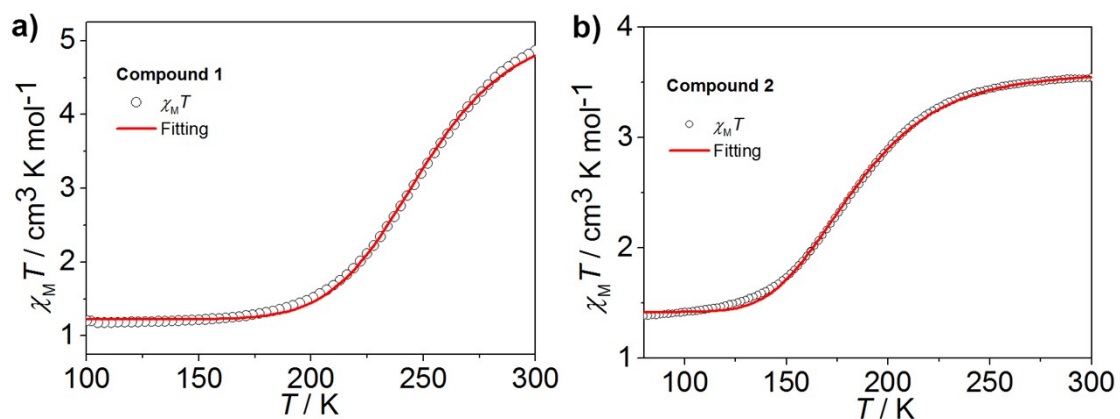

**Fig. S13** Temperature-dependent  $\chi_M T$  plots for a) **1** and b) **2** in the cooling mode, the red lines represent the best fitting using the Slichter-Drickamer model.
