# Supplementary material for: Spin and valence isomerism in cyanide-bridged {FeIII2MII} (M = Fe and Co) clusters
Source: Royal Society of Chemistry journal article supplement (doi:10.1039/d1dt01298c), 2021-01-01
Supplement: d1dt01298c2.pdf [file d1dt01298c2.pdf]

Table of Contents

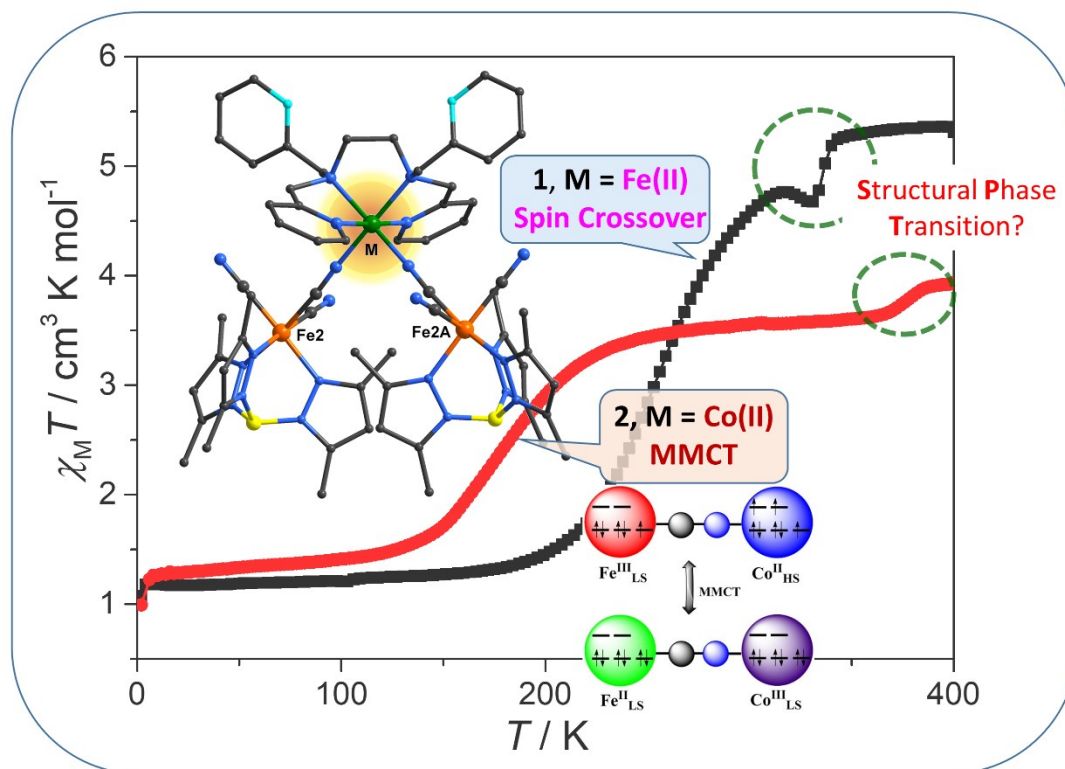

Two isostructural cyanide-bridged  $\{Fe_2M\}$  ( $M = Fe$  (**1**),  $Co$  (**2**)) clusters with V-shaped structures were investigated. Both **1** and **2** exhibit reversible spin transition due to spin crossover for **1** while electron-transfer coupled spin transition for **2** with additional irreversible susceptibility changes at high temperatures.
